# Supplementary material for: The Effects of Temperature on Accident and Emergency Department Attendances in London: A Time-Series Regression Analysis
Source: PubMed Central journal article supplement (PMC7142952; doi:10.3390/ijerph17061957), 2020-03-17
Supplement: ijerph-17-01957-s001.pdf [file ijerph-17-01957-s001.pdf]

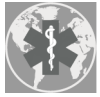

Supplementary Material

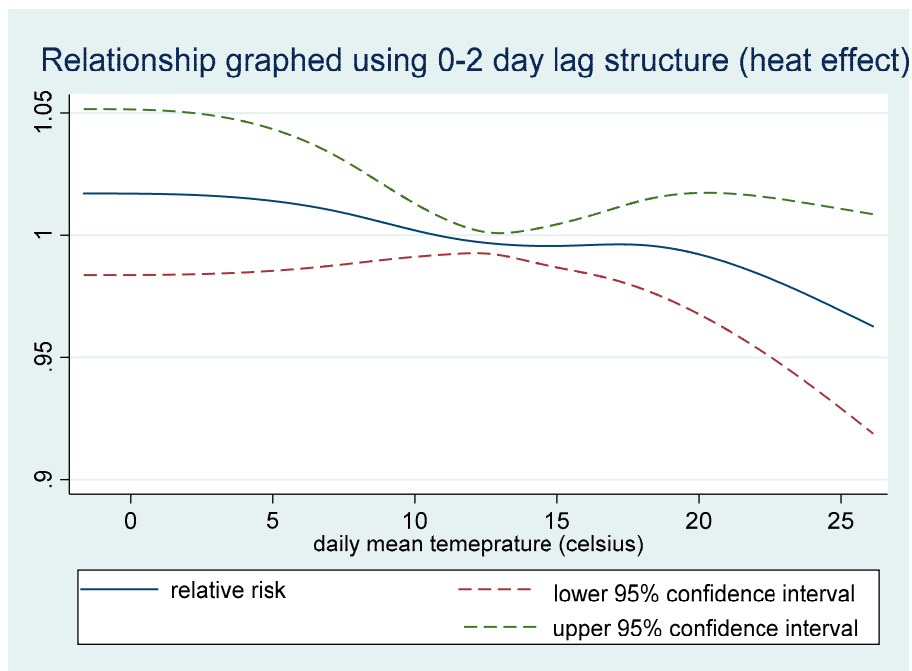

(a)

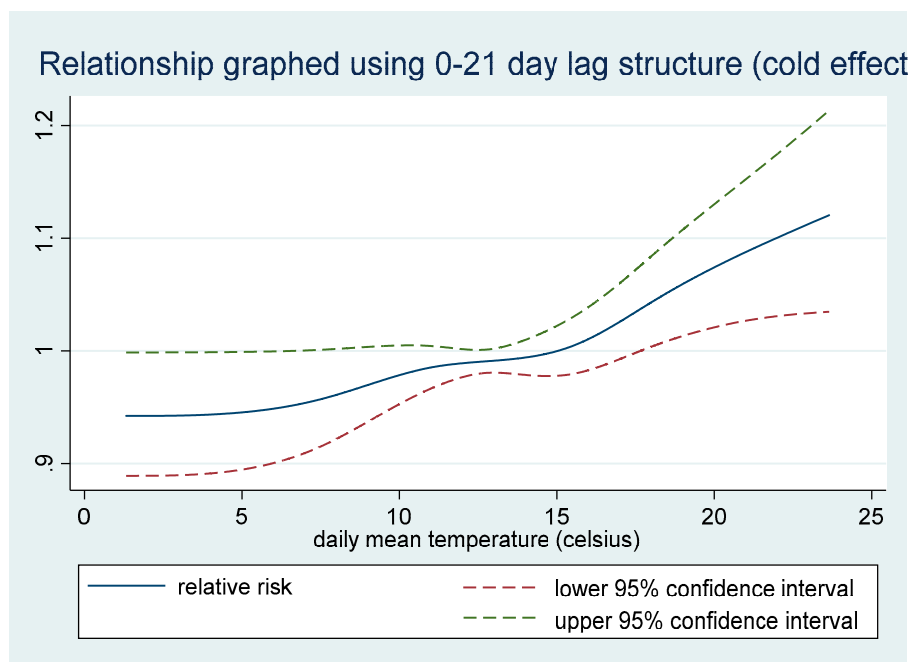

(b)

**Figure S1.** Relations between daily mean temperature and all A&E attendances, adjusted for seasonality, long term trend and day of the week. Temperature ( $^{\circ}\text{C}$ ) on the x-axis (a) 0- to 2-day lag average and (b) 0- to 21-day lag average, and relative risk on the y-axis.

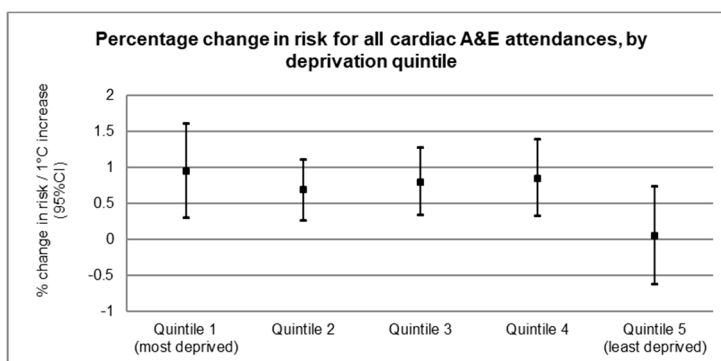

(a)

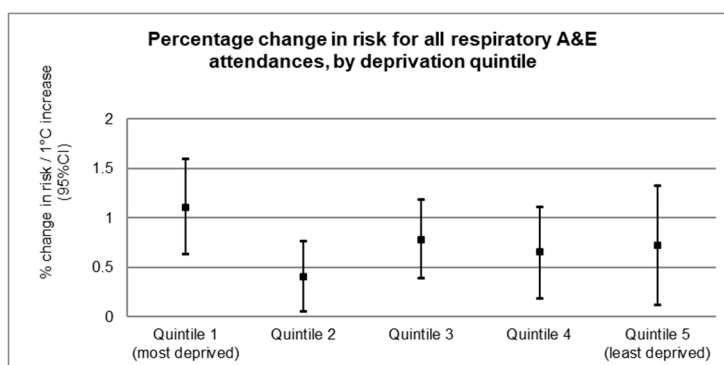

(b)

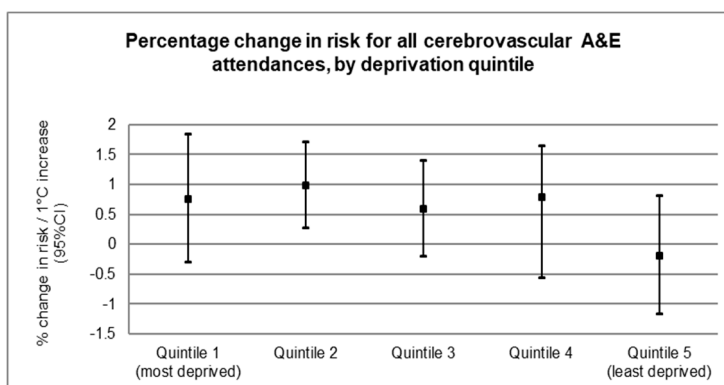

(c)

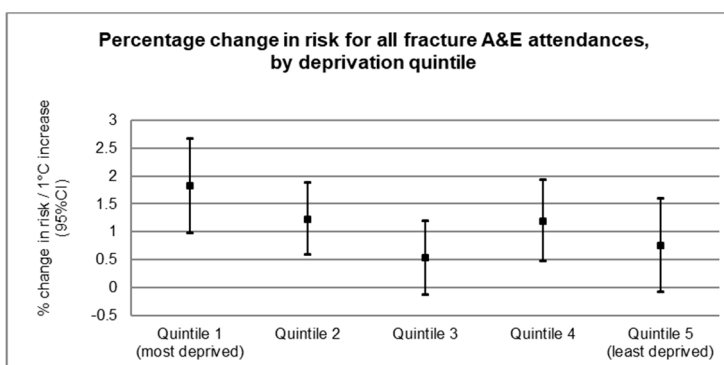

(d)

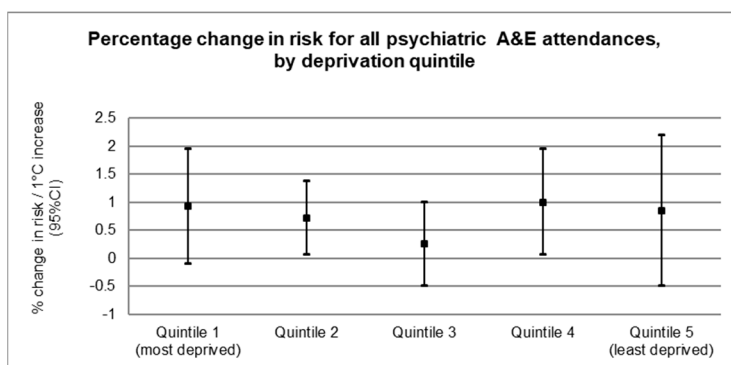

(e)

**Figure S2.** Effect modification by deprivation quintile for all cause-specific attendances: **(a)** cardiac, **(b)** respiratory, **(c)** cerebrovascular, **(d)** fractures and **(e)** psychiatric conditions.

**Table S1.** Summary of main findings from the regression model investigating the heat effect, by cause and by age.

| HEAT RELATED PERCENTAGE CHANGE IN RISK OF ATTENDING A&E PER 1°C INCREASE IN MEAN TEMPERATURE |              |            |         |              |            |         |              |              |         |              |            |         |
|----------------------------------------------------------------------------------------------|--------------|------------|---------|--------------|------------|---------|--------------|--------------|---------|--------------|------------|---------|
|                                                                                              | AT 0-DAY LAG |            |         | AT 1-DAY LAG |            |         | AT 2-DAY LAG |              |         | TOTAL EFFECT |            |         |
|                                                                                              | %increase    | 95% CI     | p-value | %increase    | 95% CI     | p-value | %increase    | 95% CI       | p-value | %increase    | 95% CI     | p-value |
| <b>1) ALL A&amp;E ATTENDANCES</b>                                                            |              |            |         |              |            |         |              |              |         |              |            |         |
| <b>0-15 years</b>                                                                            | 0.7          | (0.5,0.9)  | <0.001  | 0.2          | (-0.1,0.4) | 0.145   | 0.5          | (0.3,0.7)    | <0.001  | 1.4          | (1.2,1.5)  | <0.001  |
| <b>16-64 years</b>                                                                           | 0.4          | (0.3,0.5)  | <0.001  | 0.2          | (0.1,0.3)  | <0.001  | 0.2          | (0.1,0.3)    | <0.001  | 0.8          | (0.7,0.9)  | <0.001  |
| <b>65-74 years</b>                                                                           | 0.4          | (0.3,0.6)  | <0.001  | 0.1          | (-0.1,0.3) | 0.234   | 0.1          | (-0.1,0.3)   | 0.209   | 0.6          | (0.5,0.8)  | <0.001  |
| <b>75-84 years</b>                                                                           | 0.5          | (0.4,0.6)  | <0.001  | 0.1          | (-0.1,0.2) | 0.756   | 0            | (-0.1,0.3)   | 0.964   | 0.6          | (0.4,0.7)  | <0.001  |
| <b>85+ years</b>                                                                             | 0.5          | (0.4,0.7)  | <0.001  | 0.2          | (-0.1,0.4) | 0.086   | -0.1         | (-0.1,0.1)   | <0.001  | 0.3          | (0.2,0.5)  | <0.001  |
| <b>all ages</b>                                                                              | 0.5          | (0.4,0.6)  | <0.001  | 0.2          | (0.1,0.3)  | <0.001  | 0.2          | (0.1,0.3)    | <0.001  | 1.0          | (0.8,1.4)  | <0.001  |
| <b>2) CARDIAC</b>                                                                            |              |            |         |              |            |         |              |              |         |              |            |         |
| <b>16-64 years</b>                                                                           | 0.5          | (0.2,0.9)  | 0.003   | -0.1         | (-0.4,0.4) | 0.886   | 0.3          | (-0.1,0.6)   | 0.147   | 0.7          | (0.4,1.1)  | <0.001  |
| <b>65-74 years</b>                                                                           | 0.7          | (0.1,1.4)  | 0.026   | 0.1          | (-0.7,0.9) | 0.758   | -0.1         | (-0.10,4)    | 0.500   | 0.6          | (0.1,1.3)  | 0.041   |
| <b>75-84 years</b>                                                                           | 0.8          | (0.2,1.4)  | 0.014   | 0.1          | (-0.7,0.8) | 0.849   | -0.2         | (-0.8,0.4)   | 0.580   | 0.7          | (0.1,1.3)  | 0.023   |
| <b>all ages</b>                                                                              | 0.7          | (0.4,0.9)  | <0.001  | 0.1          | (-0.3,0.4) | 0.790   | -0.1         | (-0.3,0.3)   | 0.948   | 0.7          | (0.4,1.0)  | <0.001  |
| <b>3) RESPIRATORY</b>                                                                        |              |            |         |              |            |         |              |              |         |              |            |         |
| <b>0-15 years</b>                                                                            | 0.3          | (-0.2,0.8) | 0.194   | 0.1          | (-0.4,0.7) | 0.607   | 0.1          | (-0.3,0.6)   | 0.606   | 0.6          | (0.1,1.0)  | 0.009   |
| <b>16-64 years</b>                                                                           | 0.3          | (-0.1,0.7) | 0.186   | -0.2         | (-0.8,0.3) | 0.256   | 0.4          | (-0.1,0.8)   | 0.067   | 0.4          | (-0.1,0.7) | 0.058   |
| <b>65-74 years</b>                                                                           | 0.3          | (-0.4,1.0) | 0.392   | 0.7          | (-0.1,1.5) | 0.099   | 0.5          | (-0.1,1.2)   | 0.112   | 1.5          | (0.9,2.1)  | <0.001  |
| <b>75-84 years</b>                                                                           | 0.1          | (-0.5,0.8) | 0.744   | 0.6          | (-0.2,1.3) | 0.132   | -0.1         | (-0.7,0.6)   | 0.996   | 0.7          | (0.1,1.3)  | 0.024   |
| <b>all ages</b>                                                                              | 0.3          | (0.1,0.6)  | 0.023   | 0.1          | (-0.3,0.4) | 0.530   | 0.3          | (-0.1,0.5)   | 0.066   | 0.7          | (0.4,0.9)  | <0.001  |
| <b>4) CEREBROVASCULAR</b>                                                                    |              |            |         |              |            |         |              |              |         |              |            |         |
| <b>16-64 years</b>                                                                           | 1.1          | (0.5,1.7)  | <0.001  | -0.1         | (-0.7,0.7) | 0.907   | -0.1         | (-0.6,0.5)   | 0.831   | 1.0          | (0.5,1.6)  | <0.001  |
| <b>all ages</b>                                                                              | 1.0          | (0.6,1.5)  | <0.001  | 0.2          | (-0.3,0.8) | 0.418   | -0.6         | (-1.0, -0.1) | 0.006   | 0.6          | (0.2,1.0)  | 0.003   |
| <b>5) PSYCHIATRIC</b>                                                                        |              |            |         |              |            |         |              |              |         |              |            |         |
| <b>16-64 years</b>                                                                           | 0.1          | (-0.4,0.5) | 0.711   | 0.1          | (-0.5,0.6) | 0.895   | 0.6          | (0.1-1.0)    | 0.010   | 0.7          | (0.3,1.1)  | 0.001   |
| <b>all ages</b>                                                                              | 0.2          | (-0.2,0.6) | 0.368   | 0.1          | (-0.1,0.6) | 0.702   | 0.4          | (-0.1, -0.8) | 0.006   | 0.7          | (0.3,1.0)  | 0.001   |
| <b>6) SOCIAL</b>                                                                             |              |            |         |              |            |         |              |              |         |              |            |         |

|                 |      |            |       |     |            |       |     |            |       |     |            |       |
|-----------------|------|------------|-------|-----|------------|-------|-----|------------|-------|-----|------------|-------|
| <b>all ages</b> | -0.1 | (-0.8,0.6) | 0.774 | 0.3 | (-0.5,1.2) | 0.522 | 0.2 | (-0.4,1.0) | 0.505 | 0.4 | (-0.3,1.1) | 0.225 |
|-----------------|------|------------|-------|-----|------------|-------|-----|------------|-------|-----|------------|-------|

(1) Abbreviations: CI confidence interval.

(2) The unconstrained distributed lag model controls for seasonality and trend as well as day of week, public holidays, relative humidity and influenza.

(3) Cause-specific age subgroups that had less than 10 daily counts were not included in the analysis due to lack of power.

(4) Results from fracture-related attendances presented in separate table as model contained a heat threshold.

**Table S2.** Percentage change in risk by deprivation quintile and cause.

| DEPRIVATION                        | CAUSE -SPECIFIC ED ATTENDANCES |               |         |
|------------------------------------|--------------------------------|---------------|---------|
|                                    | %change                        | 95% CI        | p-Value |
| <b>OVERALL ATTENDANCES</b>         |                                |               |         |
| Quintile 1                         | 1.02                           | (0.93,1.10)   | <0.001  |
| Quintile 2                         | 0.86                           | (0.76,0.95)   | <0.001  |
| Quintile 3                         | 0.78                           | (0.69,0.87)   | <0.001  |
| Quintile 4                         | 0.77                           | (0.67,0.86)   | <0.001  |
| Quintile 5                         | 0.74                           | (0.62,0.86)   | <0.001  |
| <b>CARDIAC ATTENDANCES</b>         |                                |               |         |
| Quintile 1                         | 0.95                           | (0.30,1.60)   | 0.004   |
| Quintile 2                         | 0.69                           | (0.26,1.10)   | 0.002   |
| Quintile 3                         | 0.80                           | (0.33,1.27)   | 0.001   |
| Quintile 4                         | 0.85                           | (0.32,1.39)   | 0.002   |
| Quintile 5                         | 0.054                          | (-0.63,0.73)  | 0.878   |
| <b>RESPIRATORY ATTENDANCES</b>     |                                |               |         |
| Quintile 1                         | 1.11                           | (0.63,1.59)   | <0.001  |
| Quintile 2                         | 0.41                           | (0.05,0.76)   | 0.027   |
| Quintile 3                         | 0.78                           | (0.39,1.18)   | <0.001  |
| Quintile 4                         | 0.66                           | (0.18,1.11)   | 0.006   |
| Quintile 5                         | 0.72                           | (0.12,1.32)   | 0.018   |
| <b>CEREBROVASCULAR ATTENDANCES</b> |                                |               |         |
| Quintile 1                         | 0.76                           | (-0.31,1.83)  | 0.162   |
| Quintile 2                         | 0.98                           | (0.26,1.70)   | 0.008   |
| Quintile 3                         | 0.59                           | (-0.2, -1.39) | 0.147   |
| Quintile 4                         | 0.79                           | (-0.57,1.63)  | 0.06    |
| Quintile 5                         | -0.19                          | (-1.18,0.81)  | 0.709   |
| <b>FRACTURE ATTENDANCES *</b>      |                                |               |         |
| Quintile 1                         | 1.82                           | (0.97,2.66)   | <0.001  |
| Quintile 2                         | 1.23                           | (0.59,1.88)   | <0.001  |
| Quintile 3                         | 0.53                           | (-0.13,1.19)  | 0.115   |
| Quintile 4                         | 1.19                           | (0.47,1.93)   | 0.001   |
| Quintile 5                         | 0.76                           | (-0.09,1.60)  | 0.081   |
| <b>PSYCHIATRIC ATTENDANCES</b>     |                                |               |         |
| Quintile 1                         | 0.92                           | (-0.10,1.94)  | 0.078   |
| Quintile 2                         | 0.72                           | (0.06,1.37)   | 0.033   |
| Quintile 3                         | 0.26                           | (-0.49,1.00)  | 0.494   |
| Quintile 4                         | 1.00                           | (0.06,1.94)   | 0.037   |
| Quintile 5                         | 0.85                           | (-0.49,2.19)  | 0.217   |

---

(1) Abbreviations: CI confidence interval .

(2) Quintile 1: most deprived; Quintile 5: least deprived .

(3) Percentage change in heat-related risk for attending A&E for every 1 °C change in mean temperature, adjusted for cold effects, seasonality and long-term trends, day of the week, relative humidity and weekly influenza counts.

(\*) The regression model for fractures includes a heat threshold of 16 °C; therefore, the results shown are the percent change in risk for every 1 °C increase in mean temperature above 16 °C.

---
